# Supplementary material for: Evaluation of the Association Between Retinal Vein Occlusion and the Risk of Atrial Fibrillation Development: A 12-Year, Retrospective Nationwide Cohort Study
Source: PubMed Central journal article supplement (PMC5098134; doi:10.1038/srep34708), 2016-11-07
Supplement: srep34708-s1.pdf [file srep34708-s1.pdf]

**Evaluation of the Association Between Retinal Vein Occlusion and the Risk of Atrial Fibrillation Development: A 12-Year, Retrospective Nationwide Cohort Study**

*Tyler Hyungtaek Rim<sup>1</sup>, Jaewon Oh<sup>2</sup>, Christopher Seungkyu Lee<sup>3</sup>, Sung Chul Lee<sup>3</sup>, Seok-Min Kang<sup>2\*</sup>, and Sung Soo Kim<sup>3,4,5\*</sup>*

<sup>1</sup>Department of Ophthalmology, National Health Insurance Service Ilsan Hospital; <sup>2</sup>Division of Cardiology, Severance Cardiovascular Hospital and Cardiovascular Research Institute, Yonsei University College of Medicine, Seoul, Korea; <sup>3</sup>Department of Ophthalmology, Severance Hospital, Institute of Vision Research, Yonsei University College of Medicine, Seoul, Korea; <sup>4</sup>Yonsei Healthcare Big Data Based Knowledge Integration System Research Center, Yonsei University College of Medicine, Seoul, Korea; <sup>5</sup>Institute of Convergence Science, Yonsei University College of Medicine, Seoul, Korea

**Supplementary Table 1.** Korean Standard Classification of Disease (KCD) for comorbidities and International Classification of Disease 9th clinical modification (ICD-9-CM).

| <b>Comorbidities</b>            | <b>KCD</b>                                                                                                                                        | <b>ICD-9-CM</b>                                                                |
|---------------------------------|---------------------------------------------------------------------------------------------------------------------------------------------------|--------------------------------------------------------------------------------|
| <b>Congestive heart failure</b> | I11.0, I13.0, I13.2, I25.5, I42.x, I43.x, I50.x                                                                                                   | 402, 404, 414.9, 425, 428                                                      |
| <b>Hyperthyroidism</b>          | E05                                                                                                                                               | 242                                                                            |
| <b>Myocardial infarction</b>    | I21.x, I22.x, I25.2                                                                                                                               | 410, 411                                                                       |
| <b>Cerebrovascular disease</b>  | I60.x, I61.x, I62.x, I63.x, I64.x, I65.x, I66.x, I67.x, I68.x, I69.x                                                                              | 430, 431, 432, 433, 434, 435, 436, 437, 438                                    |
| <b>Hypertension</b>             | I10                                                                                                                                               | 401                                                                            |
| <b>Diabetes mellitus</b>        | E10, E11, E12, E13, E14                                                                                                                           | 250                                                                            |
| <b>Chronic kidney disease</b>   | N18.x, N19.x                                                                                                                                      | 585, 586                                                                       |
| <b>Chronic lung disease</b>     | I27.8, I27.9, J40.x, J41.x, J42.x, J43.x, J44.x, J45.x, J46.x, J47.x, J60.x, J61.x, J62.x, J63.x, J64.x, J65.x, J66.x, J67.x, J68.4, J70.1, J70.3 | 416, 491, 492, 493, 494, 495, 496, 500, 501, 502, 503, 504, 505, 506, 507, 508 |
| <b>Liver disease</b>            | B18.x, K70.x, K71.x, K72.x, K73.x, K74.x, K76.x, Z94.4, I85.0, I85.9, I86.4, I98.2                                                                | 070, 571, 572, 573, 456.2                                                      |
